# Supplementary material
Source: PubMed Central journal article supplement (PMC5173454)
Supplement: NIHMS797159-supplement-216_2016_9662_MOESM1_ESM.pdf [file NIHMS797159-supplement-216_2016_9662_MOESM1_ESM.pdf]

## **Analytical and Bioanalytical Chemistry**

### **Electronic Supplementary Material**

#### **Analysis of heparin oligosaccharides by capillary electrophoresis- negative-ion electrospray ionization mass spectrometry**

Lei Lin, Xinyue Liu, Fuming Zhang, Lianli Chi, I. Jonathan Amster, Franklyn E. Leach III, Qiangwei Xia, Robert J. Linhardt

## Negative mode CE-MS

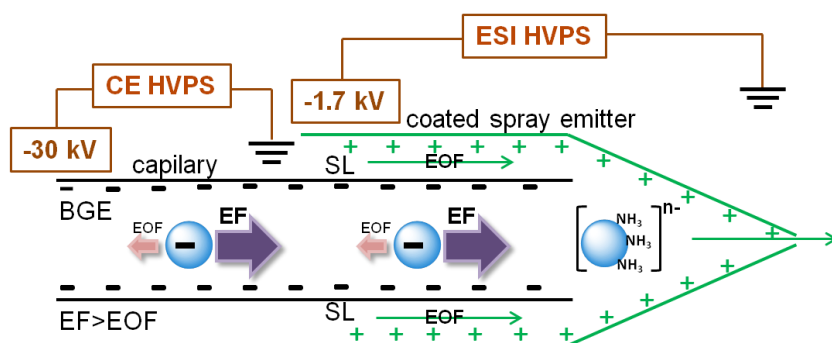

HVPS: high voltage power supply  
 EF: electrophoretic force      EOF: electro-osmotic flow

- Bare capillary
- Spray emitter: coated borosilicate glass
- Background electrolyte (BGE) & sheath liquid (SL):  
 10 mM ammonium acetate in 80% aqueous methanol
- In high organic solvent, EF > EOF

**Fig. S1** Schematic representation of negative mode CE-MS system

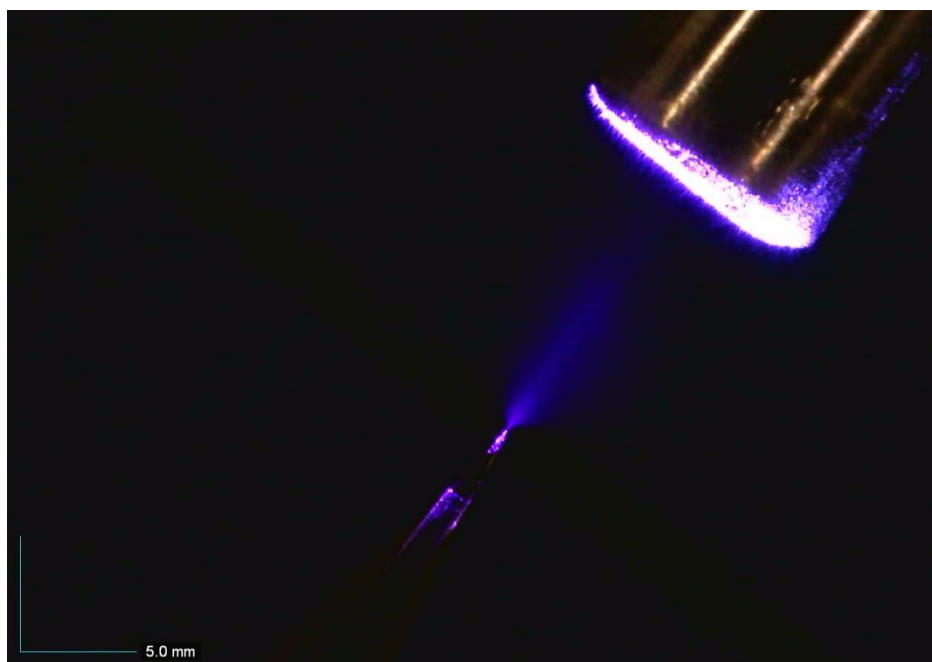

**Fig. S2** Photograph of the electrospray taken by a microscope camera

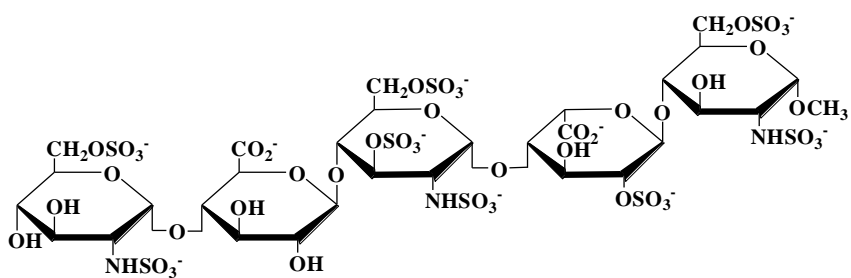

**Fig. S3** The structure of Arixtra®

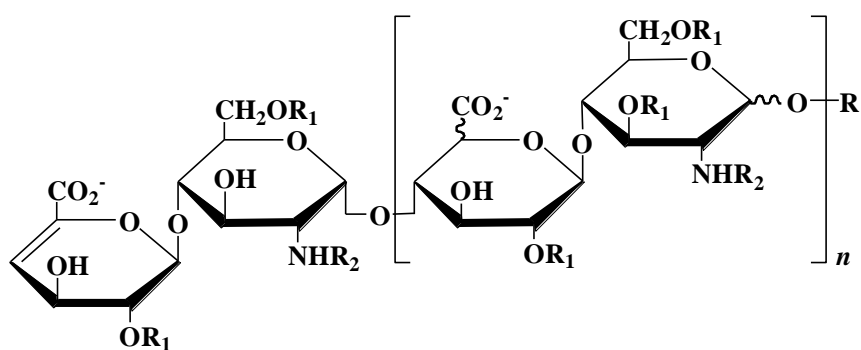

|                |                                                   |                         |
|----------------|---------------------------------------------------|-------------------------|
| R              | <br>( $n=0$ to 20)                                | H<br><br>( $n=1$ to 21) |
| R <sub>1</sub> | H or SO <sub>3</sub> <sup>-</sup>                 |                         |
| R <sub>2</sub> | SO <sub>3</sub> <sup>-</sup> or COCH <sub>3</sub> |                         |

**Fig. S4** The generalized structure of Lovenox®

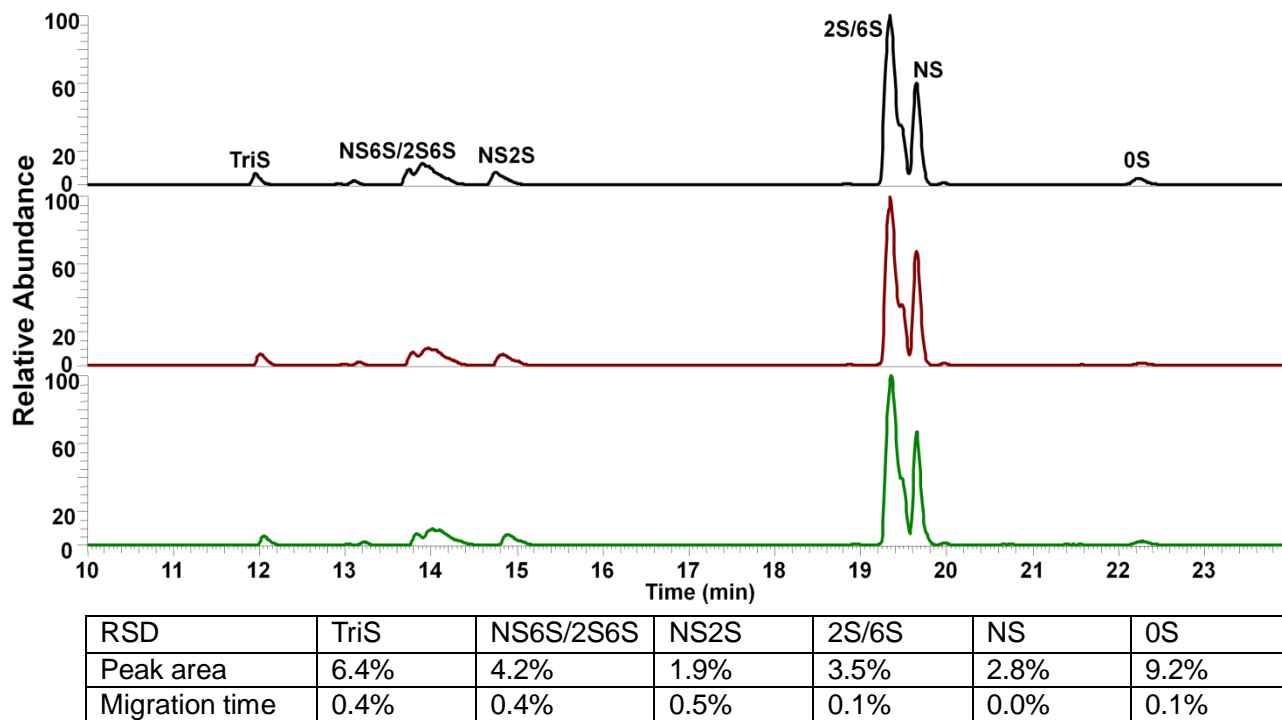

**Fig. S5** Reproducibility test of 8 disaccharide standards

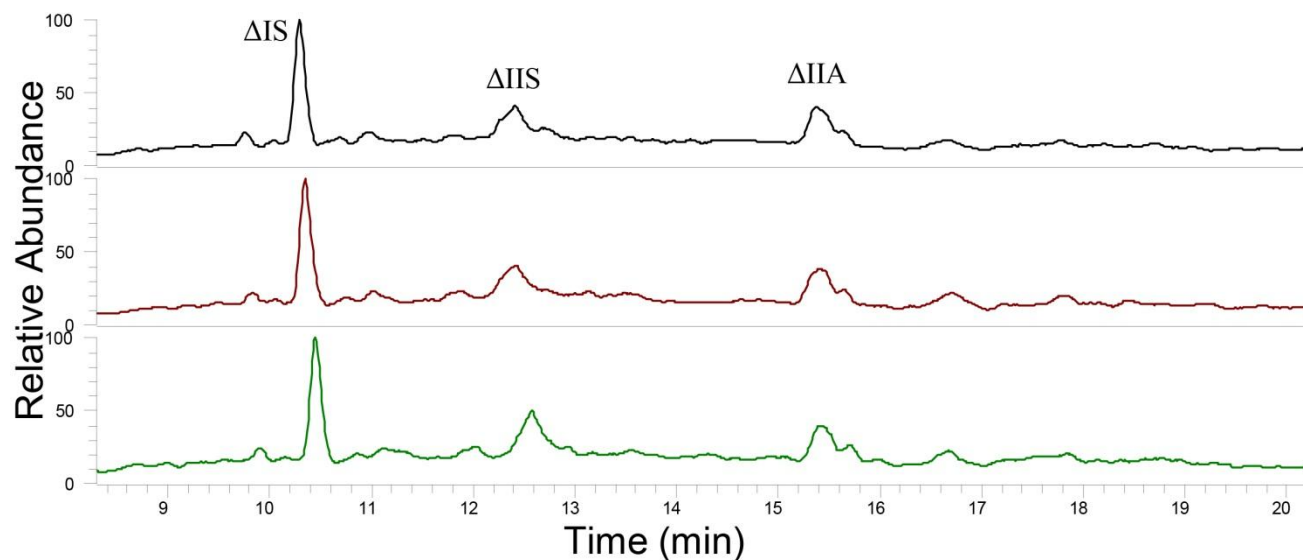

**Fig. S6** Reproducibility test of CE-MS for LMWH digestion (Lovenox®)

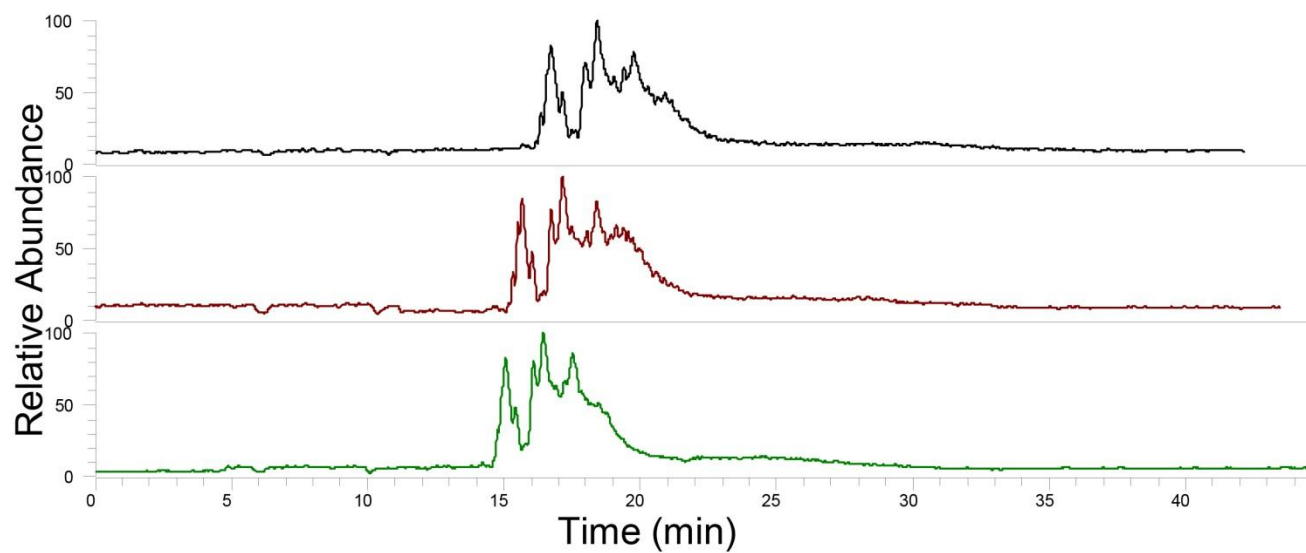

**Fig. S7** Reproducibility test of CE-MS for LMWH intact chains (Lovenox®)
